# Supplementary material
Source: PubMed Central journal article supplement (PMC4364296)

Table S1. Summary of reported apparent Kds for FtsZ or CCTP with its binding partners.

|                         | Kd for FtsZ<br>( $\mu\text{M}$ ) | Kd for CCTP<br>( $\mu\text{M}$ ) | Method           | Reference                          |
|-------------------------|----------------------------------|----------------------------------|------------------|------------------------------------|
| ZipA <sup>186-328</sup> | ~0.2                             | ~21.6 to 35                      | ELISA, SPR & ITC | (Mosyak et al., 2000)              |
| ZipA                    | 0.043-0.085                      | ND                               | FS               | (Kuchibhatla et al., 2011)         |
| ZipA <sup>185-328</sup> | ND                               | 7                                | SPR & FP         | (Kenny et al., 2003)               |
| ZipA <sup>186-328</sup> | 0.2                              | ND                               | ELISA            | (Haney et al., 2001)               |
| ZipA <sup>26-328</sup>  | 1.7-5.8                          | ND                               | CG-SLS           | (Martos et al., 2010)              |
| Nd-ZipA                 | 40                               | ND                               | FCS              | (Hernandez-Rocamora et al., 2012b) |
| FtsA                    | ND                               | 45-58                            | ITC              | (Szwedziak et al., 2012)           |
| SlmA                    | 0.12-0.2                         | ND                               | FP               | (Tonthat et al., 2011)             |
| SlmA                    | 0.21                             | 81                               | BI               | (Du and Lutkenhaus, 2014)          |

ND: Not Done

BI: Biolayer Interferometry

CG-SLS: Composition Gradient-Static Light Scattering

FCS: Fluorescence Correlation Spectroscopy

FP: Fluorescence Polarization

ITC: Isothermal Titration Calorimetry

Nd-ZipA: ZipA embedded in Nanodisc

SPR: Surface plasmon resonance

Fig. S1

Ztail peptide binds SBS-SImA with low affinity

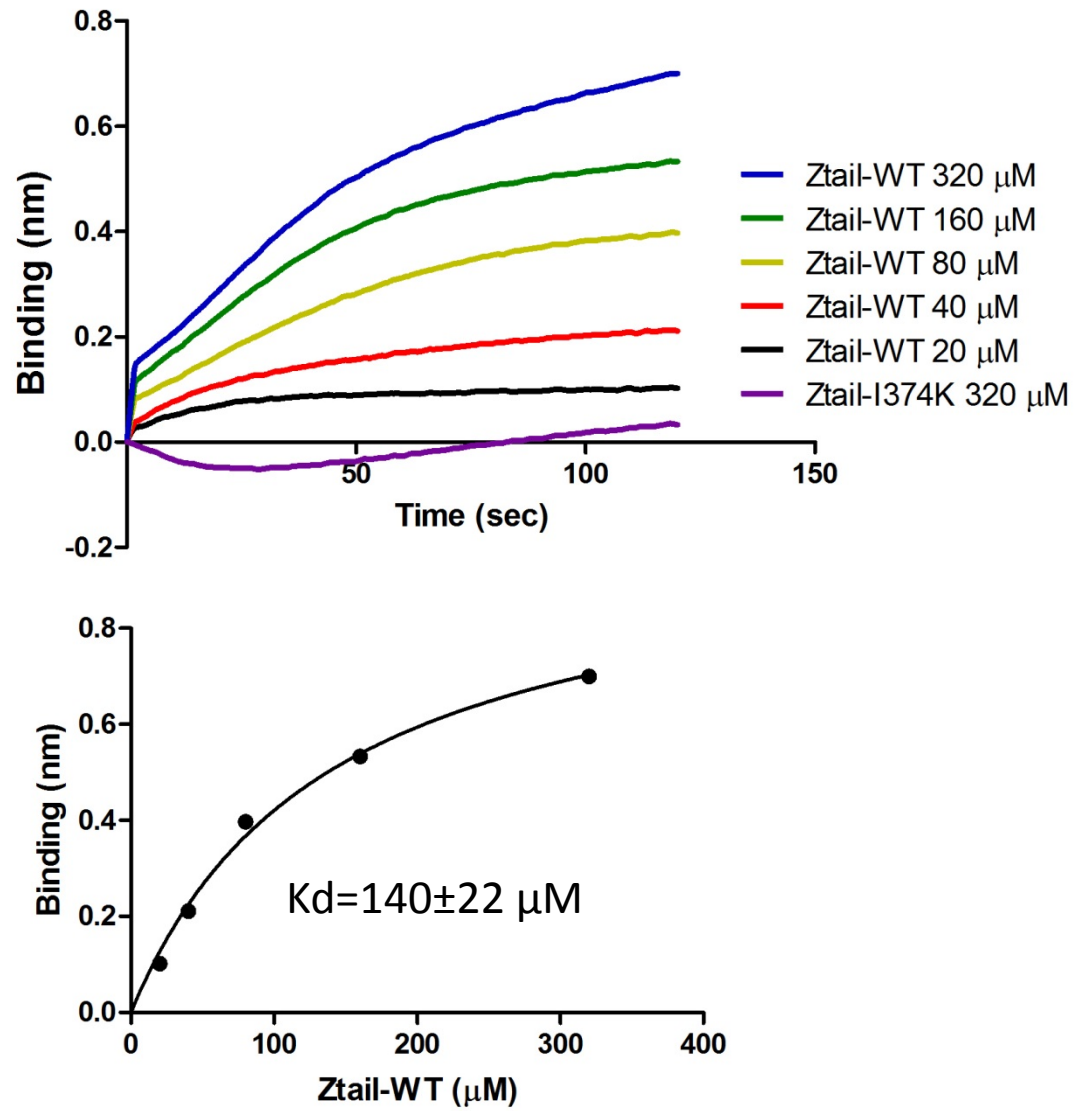

Fig. S2

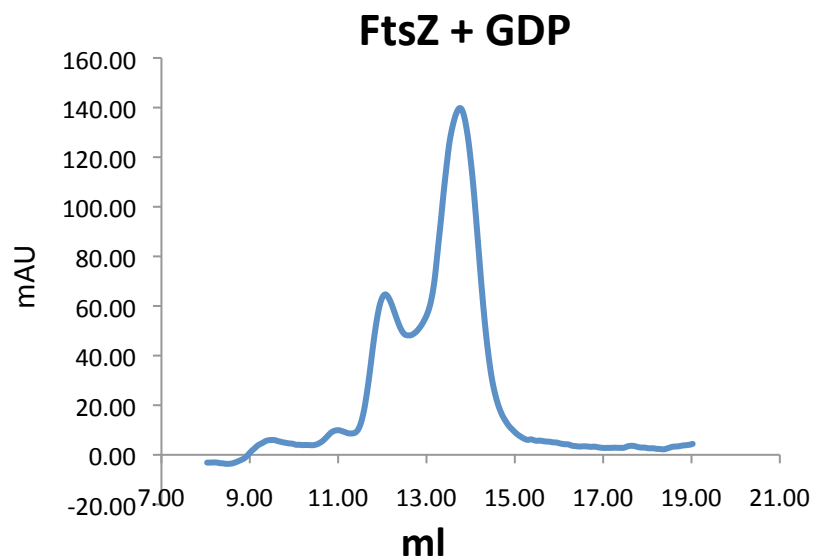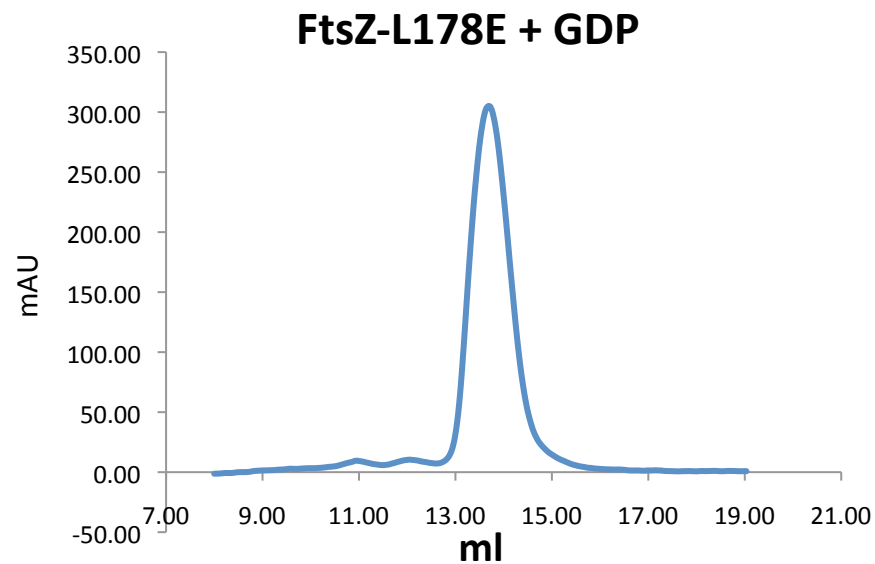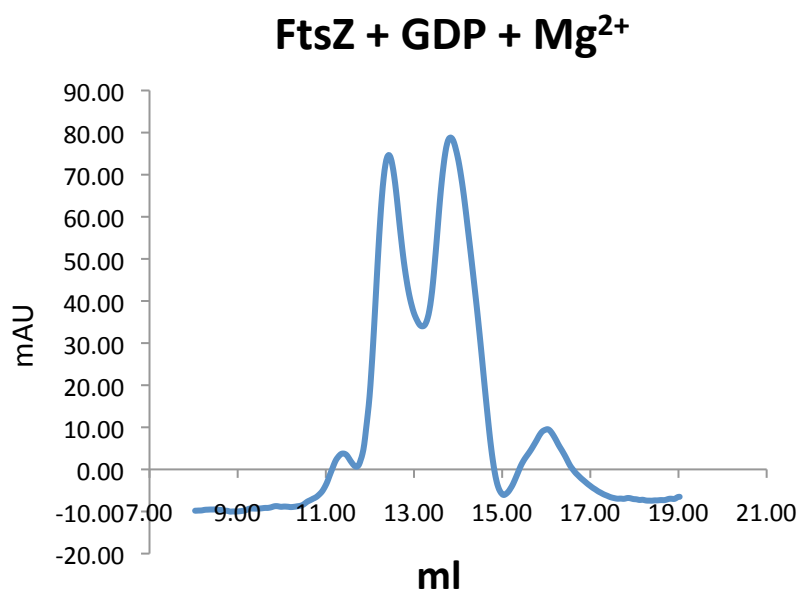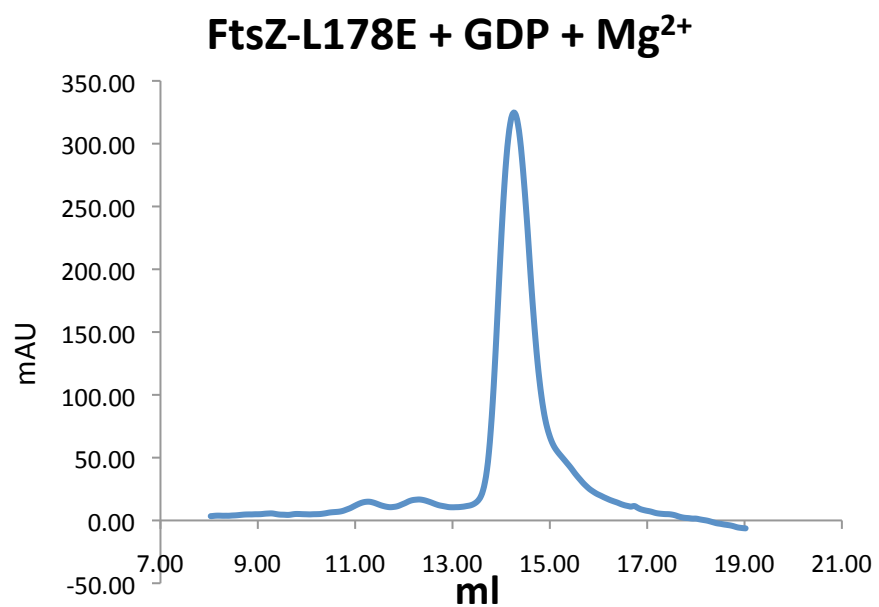

Fig. S3

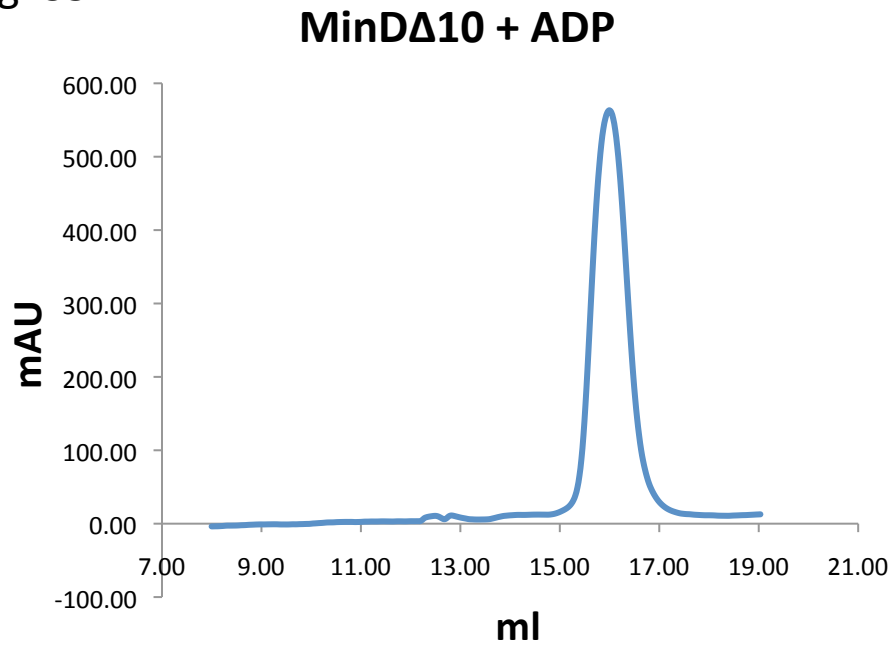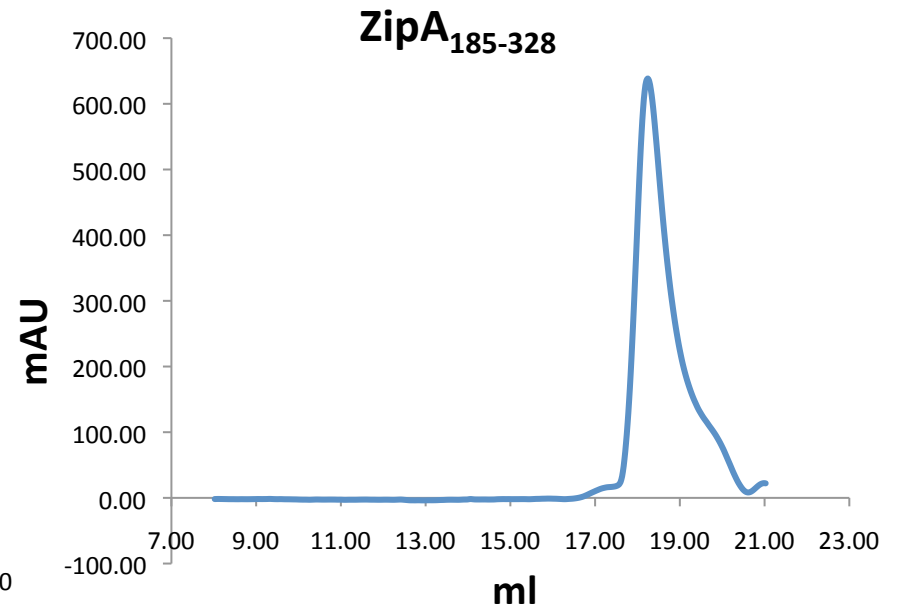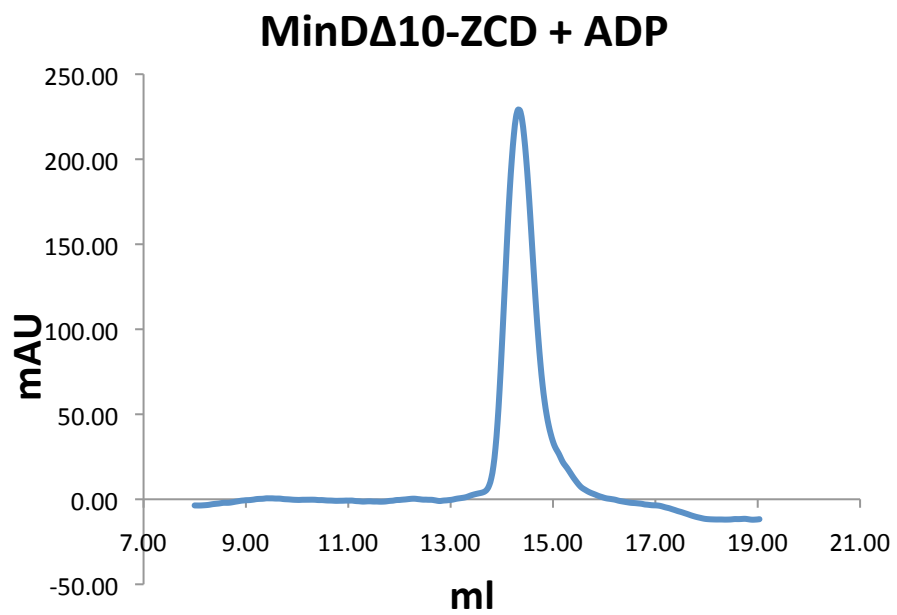

Fig. S4

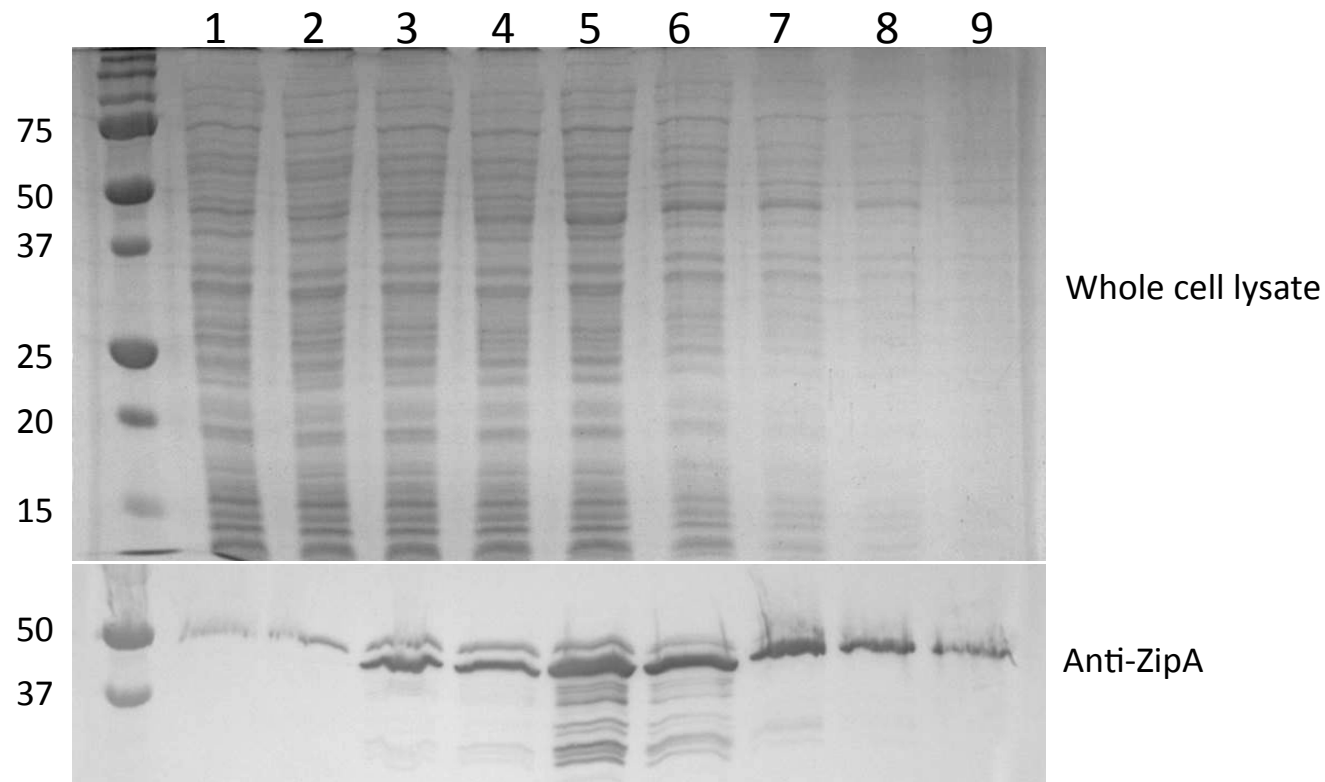

- 1: S4/pSD218-MinD $\Delta$ 10-ZipA<sub>185-328</sub> glucose
- 2: S4/pSD218-MinD(K11A) $\Delta$ 10-ZipA<sub>185-328</sub> glucose
- 3: S4/pSD218-MinD $\Delta$ 10-ZipA<sub>185-328</sub> +40  $\mu$ M IPTG
- 4: S4/pSD218-MinD(K11A) $\Delta$ 10-ZipA<sub>185-328</sub> + 40  $\mu$ M IPTG
- 5: S4/ S4/pSD218-MinD(K11A) $\Delta$ 10-ZipA<sub>185-328</sub> 80  $\mu$ M IPTG
- 6-9: 2 $\times$  serial dilution of the sample in lane 5

Fig. S5

FtsZ binding to ZipA<sub>185-328</sub> on the biosensor at pH 8.0 with 200 mM KCl

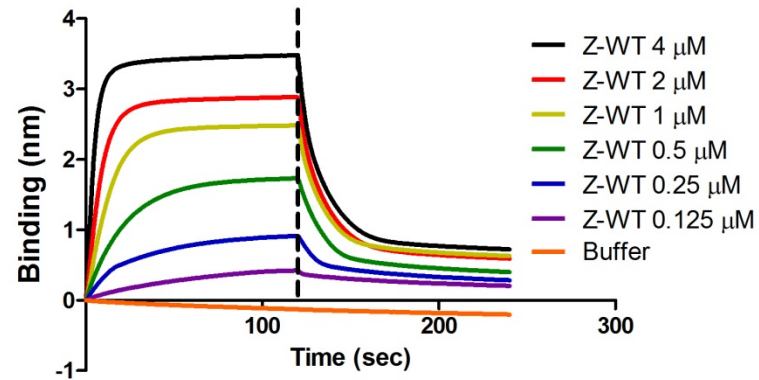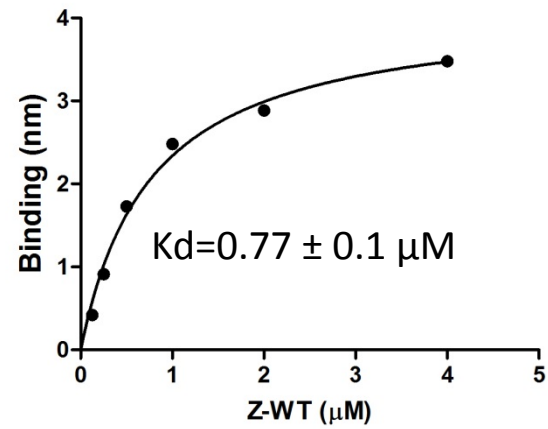

Supplement: NIHMS656635-supplement-Supplementary_Data.pdf [file NIHMS656635-supplement-Supplementary_Data.pdf]
